# Supplementary material for: The effects of physical exercise on cardiometabolic outcomes in women with polycystic ovary syndrome not taking the oral contraceptive pill: a systematic review and meta-analysis
Source: PubMed Central journal article supplement (PMC6915192; doi:10.1007/s40200-019-00425-y), 2019-07-29
Supplement: 40200_2019_425_MOESM1_ESM.pdf [file 40200_2019_425_MOESM1_ESM.pdf]

**The effects of exercise on cardiometabolic outcomes in women with polycystic ovary syndrome not taking the oral contraceptive pill: A systematic review and meta-analysis.**

**Journal of Diabetes and Metabolic Disorders**

Ms Amie Woodward, BSc (Hons), MSc. Doctoral Researcher, Faculty of Health and Wellbeing, Sheffield Hallam University, Sheffield, S10 2BP. Amie.woodward@shu.ac.uk\*

Dr David Broom, PhD. Reader of Physical Activity and Health, Faculty of Health and Wellbeing, Sheffield Hallam University, Collegiate Crescent, Sheffield, S10 2BP.

[D.r.broom@shu.ac.uk](mailto:D.r.broom@shu.ac.uk)

Deborah Harrop, BA (Hons), MA, PGCERT. Information Scientist, Nursing and Midwifery, Faculty of Health and Wellbeing, Sheffield Hallam University. D.harrop@shu.ac.uk

Dr Ian Lahart, BA (Hons), MSc, PGCERT, PhD. Senior Lecturer in Sport and Exercise Physiology. Institute of Human Science, University of Wolverhampton, Wolverhampton, WV1 1LY. I.lahart@wlv.ac.uk

Dr Anouska Carter, PhD. Senior Sports Science Manager, Faculty of Health and Wellbeing, Sheffield Hallam University, Collegiate Crescent, Sheffield, S10 2BP. A.carter@shu.ac.uk

Dr Caroline Dalton, BSc, PhD. Senior Lecturer, Faculty of Health and Wellbeing, Sheffield Hallam University, Sheffield, S10 2BP Sheffield Hallam University. C.F.Dalton@shu.ac.uk

Dr Mostafa Metwally, MD, FRCOG, MBBCh. Consultant Gynaecologist, Jessop Wing, Tree Root Walk, Sheffield S10 2SF. Mmetwally@nhs.net

Dr Markos Klonizakis, Beng (Hons), MSc, D.Phil. Reader, Faculty of Health and Wellbeing, Sheffield Hallam University, Sheffield, S10 2BP. M.klonzakis@shu.ac.uk

\* Corresponding Author

The search was performed using PubMed syntax as demonstrated below, and amended for other databases:

1. "polycystic ovary syndrome"
2. PCOS
3. PCO\*
4. polycystic ovar\*
5. stein leventhal
6. (1 OR 2 OR 3 OR 4 OR 5)
7. Exercise[majr]
8. exercise therapy [majr]
9. Physical activity [majr]
10. Physical Fitness [majr]
11. Physical Endurance[majr]
12. exercis\*[tw]
13. ((physical or motion) AND (fitness or therapy or therapies))[tw]
14. ((strength or resistance or circuit or enduran\* or aerob\* or physic\* or fit\*) AND train\* )[tw]
15. (7 OR 8 OR 9 OR 10 OR 11 OR 12 OR 13 OR 14)
16. (6 AND 15)

(((((("polycystic ovary syndrome"[Title/Abstract]) OR PCOS[Title/Abstract]) OR  
PCO\*[Title/Abstract]) OR polycystic ovar\*[Title/Abstract]) OR stein  
leventhal[Title/Abstract]))) AND ((((((Exercise[majr]) OR exercise therapy [majr]) OR  
Physical activity [majr]) OR Physical Endurance[majr]) OR exercis\*[tw]) OR (((physical or  
motion) AND (fitness or therapy or therapies))[tw])) OR (((strength or resistance or circuit or  
enduran\* or aerob\* or physic\* or fit\*) AND train\*[tw]))
