# Supplementary material for: The effects of physical exercise on cardiometabolic outcomes in women with polycystic ovary syndrome not taking the oral contraceptive pill: a systematic review and meta-analysis
Source: PubMed Central journal article supplement (PMC6915192; doi:10.1007/s40200-019-00425-y), 2019-07-29
Supplement: 40200_2019_425_MOESM2_ESM.pdf [file 40200_2019_425_MOESM2_ESM.pdf]

**The effects of exercise on cardiometabolic outcomes in women with polycystic ovary syndrome not taking the oral contraceptive pill: A systematic review and meta-analysis.**

**Journal of Diabetes and Metabolic Disorders**

Ms Amie Woodward, BSc (Hons), MSc. Doctoral Researcher, Faculty of Health and Wellbeing, Sheffield Hallam University, Sheffield, S10 2BP. Amie.woodward@shu.ac.uk

Dr David Broom, PhD. Reader of Physical Activity and Health, Faculty of Health and Wellbeing, Sheffield Hallam University, Collegiate Crescent, Sheffield, S10 2BP.

[D.r.broom@shu.ac.uk](mailto:D.r.broom@shu.ac.uk)

Deborah Harrop, BA (Hons), MA, PGCERT. Information Scientist, Nursing and Midwifery, Faculty of Health and Wellbeing, Sheffield Hallam University. D.harrop@shu.ac.uk

Dr Ian Lahart, BA (Hons), MSc, PGCERT, PhD. Senior Lecturer in Sport and Exercise Physiology. Institute of Human Science, University of Wolverhampton, Wolverhampton, WV1 1LY. I.lahart@wlv.ac.uk

Dr Anouska Carter, PhD. Senior Sports Science Manager, Faculty of Health and Wellbeing, Sheffield Hallam University, Collegiate Crescent, Sheffield, S10 2BP. A.carter@shu.ac.uk

Dr Caroline Dalton, BSc, PhD. Senior Lecturer, Faculty of Health and Wellbeing, Sheffield Hallam University, Sheffield, S10 2BP Sheffield Hallam University. C.F.Dalton@shu.ac.uk

Dr Mostafa Metwally, MD, FRCOG, MBBCh. Consultant Gynaecologist, Jessop Wing, Tree Root Walk, Sheffield S10 2SF. Mmetwally@nhs.net

Dr Markos Klonizakis, Beng (Hons), MSc, D.Phil. Reader, Faculty of Health and Wellbeing, Sheffield Hallam University, Sheffield, S10 2BP. M.klonzakis@shu.ac.uk

\* Corresponding Author

| <b>Trial</b>          | <b>Bias Domain</b> | <b>Source of Bias</b>                  | <b>Author's judgement</b> | <b>Support for judgement</b>                                                                                                                                                                                                                                  |
|-----------------------|--------------------|----------------------------------------|---------------------------|---------------------------------------------------------------------------------------------------------------------------------------------------------------------------------------------------------------------------------------------------------------|
| Vigorito et al. 2007  | Selection Bias     | Random sequence generation             | Unclear Risk              | Not reported                                                                                                                                                                                                                                                  |
|                       |                    | Allocation concealment                 | Unclear Risk              | Not reported.                                                                                                                                                                                                                                                 |
|                       | Performance Bias   | Blinding of participants and personnel | N/A                       | We did not include whether participants were blind to their allocation of intervention or to control groups, as it is often not possible (e.g. in a supervised exercise setting) to blind participants to an intervention while promoting exercise behaviour. |
|                       | Detection Bias     | Blinding of outcome assessment         | Low Risk                  | All clinical assessments were performed by the same physician who was blinded to the patient allocation.                                                                                                                                                      |
|                       | Attrition Bias     | Incomplete outcome data                | Low Risk                  | No attrition reported.                                                                                                                                                                                                                                        |
|                       | Reporting Bias     | Selective reporting                    | Unclear Risk              | Unable to locate study protocol                                                                                                                                                                                                                               |
|                       | Other Bias         | Adherence                              | Low Risk                  | All participants completed the study protocol.                                                                                                                                                                                                                |
| Giallauria et al 2008 | Selection Bias     | Random sequence generation             | High Risk                 | Allocation by patient choice                                                                                                                                                                                                                                  |
|                       |                    | Allocation concealment                 | High Risk                 | Patients chose allocation                                                                                                                                                                                                                                     |
|                       | Performance Bias   | Blinding of participants and personnel | N/A                       | We did not include whether participants were blind to their allocation of intervention or to control groups, as it is often not possible (e.g. in a supervised exercise setting) to blind participants to an intervention while promoting exercise behaviour. |
|                       | Detection Bias     | Blinding of outcome assessment         | Low Risk                  | A physician who was blinded to the patient allocation performed all clinical assessments.                                                                                                                                                                     |

|                   |                  |                                        |              |                                                                                                                                                                                                                                                               |
|-------------------|------------------|----------------------------------------|--------------|---------------------------------------------------------------------------------------------------------------------------------------------------------------------------------------------------------------------------------------------------------------|
|                   | Attrition Bias   | Incomplete outcome data                | Low Risk     | No attrition reported.                                                                                                                                                                                                                                        |
|                   | Reporting Bias   | Selective reporting                    | Unclear Risk | Unable to locate study protocol                                                                                                                                                                                                                               |
|                   | Other Bias       | Adherence                              | Low Risk     | Adherence was reported as 80%                                                                                                                                                                                                                                 |
| Sprung et al 2013 | Selection Bias   | Random sequence generation             | High Risk    | Allocation by patient choice                                                                                                                                                                                                                                  |
|                   |                  | Allocation concealment                 | High Risk    | Patients chose allocation                                                                                                                                                                                                                                     |
|                   | Performance Bias | Blinding of participants and personnel | N/A          | We did not include whether participants were blind to their allocation of intervention or to control groups, as it is often not possible (e.g. in a supervised exercise setting) to blind participants to an intervention while promoting exercise behaviour. |
|                   | Detection Bias   | Blinding of outcome assessment         | Unclear Risk | Not reported                                                                                                                                                                                                                                                  |
|                   | Attrition Bias   | Incomplete outcome data                | Low Risk     | No attrition reported.                                                                                                                                                                                                                                        |
|                   | Reporting Bias   | Selective reporting                    | Unclear Risk | Unable to locate study protocol                                                                                                                                                                                                                               |
|                   | Other Bias       | Adherence                              | Low Risk     | 91% adherence reported                                                                                                                                                                                                                                        |
